# Supplementary material for: Genetic Testing in the Diagnosis and Treatment of Cerebral venous sinus thrombosis: A Case Report
Source: Research Square preprint supplement (doi:10.21203/rs.3.rs-7870399/v1), 2025-11-18
Supplement: Supplementary file 1 [file 4398bd23d91d673d644fd1dd.docx]

**Supplementary Materials**

**Supplementary Table 1 The results of coagulation and thrombophilia screening**

| **Coagulation screening** | **Result** | **Reference interval** |
| --- | --- | --- |
| PT(s) | 13.4 | 10-16.7 |
| APTT(s) | 39.1 | 20-47 |
| Fibrinogen(g/L) | 2.56 | 2-4 |
| Thrombin time | 17.3 | 14-21 |
| **Thrombophilia screening** | **Result** | Reference interval |
| Antithrombin activity (%) | 103 | 80-120 |
| Protein C activity | 41 | 70-130 |
| Protein S activity | 126.1 | 55-140 |

**Supplementary Table 2 Genetic analysis reported a heterozygous mutation in PROC**

| **Genetic analysis report** | |
| --- | --- |
| **Gene** | PROC |
| **Transcript Exon** | NM_000312 exon9 |
| **The change of Nucleotide and Amino acid** | c. 1015G>A p. V339M |
| **Chromosomal location** | Chr2.128186151 |
| **Genotype** | Heterozygote |

**Supplementary Table 3 Report of genetic testing for individualized anticoagulant drug use guidance**

| **Report of genetic testing for individualized anticoagulant drug use guidance** | | | | | |
| --- | --- | --- | --- | --- | --- |
| **Drug name** | **Gene** | **Detection sites** | **Gene**  **type** | **Clinical significance** | **Medication suggestion** |
| Warfarin | CYP2C9 | rs1799853  (*2) | *1/*1（EM） | CYP2C9*1/*1 fast metabolizers (EM) may have a lower risk of hypercoagulability and bleeding and are routinely prescribed | Conventional dosage |
| rs1057910  (*3) |
| VKORC1 | rs9923231 | TT | TT type patients with excessive anticoagulation and increased risk of bleeding, the time to reach the target INR can be shortened, it is recommended to adjust the dosage by referring to the formula | To adjust the dosage by referring to the formula |
| CYP4F2 | rs2108622 | CC | Patients with CC type may be at higher risk of excessive anticoagulation, and it is recommended to adjust the dosage by referring to the formula | To adjust the dosage by referring to the formula |
| Rivaroxaban | ABCB1 | rs1045642 | GG | Patients with GG/CC type may have an increased risk of thromboembolic events when using rivaroxaban, and should be wary of insufficient efficacy | Increasing the dose or switching to alternative medication |
| rs2032582 | CC |
| Apixaban | ABCG2  CYP3A5 | rs2231142 | GT | Patients with GT type exhibit increased clearance of apixaban, leading to decreased blood concentration of the drug. | Conventional dosage |
| rs776746  (*3) | *3/*3（PM） | Patients with CYP3A5*3/*3 genotype, classified as poor metabolizers (PM), experience decreased clearance of apixaban, resulting in increased blood concentration of the drug, potentially elevating the risk of adverse reactions. It is recommended to avoid high doses of apixaban, as well as to refrain from co-administrating other drugs metabolized by CYP3A5 or CYP3A5 inhibitors. | Pay attention to blood concentration to be alert to increased risk of adverse reactions |
| Dabigatran ester | ABCB1 | rs1045642 | GG | Patients with GG type may have a lower risk of severe bleeding events than patients with AA and AG type | Conventional dosage |

EM：extensive metabolizers PM：poor metabolizers

Warfarin dosage calculation formula based on Chinese population:

Steady dose of warfarin D (mg/day) = [1.432+0.338 × (VKORC1 -1639AG) + 0.579 × (VKORC1-1639GG) ‒ 0.263×(CYP2C9*1*3) ‒ 0.852× (CYP2C9*3*3) - 0.004 Age + 0.264 × BSA +0.057 × AVR + 0.065 × Sex + 0.085 × Smoking habit + 0.057 × Atrial fibrillation + 0.132×Aspirin -0.0592 × Amiodarone] 2

Note: VKORC1-1639GG is assigned a value of 1 for patients with -1639GG genotype and 0 for those with -1639AA or -1639AG genotypes. CYP2C913 is designated as 1 for the CYP2C913 genotype, and 0 for CYP2C911 or CYP2C933 genotypes. CYP2C933 is assigned a value of 1 for CYP2C933 genotype, and 0 for CYP2C911 or CYP2C913 genotypes. Age refers to the patient's age. BSA represents body surface area, calculated as BSA = 0.0061 × height + 0.0128 × weight - 0.1529. AVR is designated as 1 when the patient has had an aortic valve replaced. Sex is assigned a value of 1 for male patients and 0 for female patients. Smoking habit indicates 1 for a history of smoking and 0 for non-smokers. Atrial fibrillation is given a value of 1 when present and 0 when absent. Aspirin is recorded as 1 for patients taking aspirin concurrently and 0 for those not taking aspirin. Amiodarone is assigned a value of 1 for patients currently taking amiodarone and 0 for those not taking amiodarone.
